# Supplementary material for: Disulfiram Sensitizes a Therapeutic-Resistant Glioblastoma to the TGF-β Receptor Inhibitor
Source: MDPI journal article supplement (doi:10.3390/ijms221910496), 2021-09-28
Supplement: s1 [file s1]

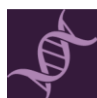

Article

# Disulfiram Sensitizes a Therapeutic-Resistant Glioblastoma to the TGF- $\beta$ Receptor Inhibitor

Chan-Chuan Liu 1, Cheng-Lin Wu 2,3, Meng-Xuan Lin 4, Chun-I Sze 1,3,4,\* and Po-Wu Gean 1,5,6,\*

1 Institute of Basic Medical Sciences, College of Medicine, National Cheng-Kung University, Tainan 701, Taiwan; sln4421@hotmail.com

2 Institute of Clinical Medicine, College of Medicine, National Cheng Kung University Hospital, National Cheng-Kung University, Tainan 701, Taiwan; wujl.towalkwithwings@gmail.com

3 Department of Pathology, College of Medicine, National Cheng Kung University Hospital, National Cheng-Kung University, Tainan 701, Taiwan

4 Department of Cell Biology and Anatomy, College of Medicine, National Cheng-Kung University, Tainan 701, Taiwan; amber002091@hotmail.com.tw

5 Department of Pharmacology, College of Medicine, National Cheng-Kung University, Tainan 701, Taiwan

6 Department of Biotechnology and Bioindustry Sciences, National Cheng-Kung University, Tainan 701, Taiwan

\* Correspondence: szec@mail.ncku.edu.tw (C. I.S.); powu@mail.ncku.edu.tw (P. W.G.)

## Supplementary Materials:

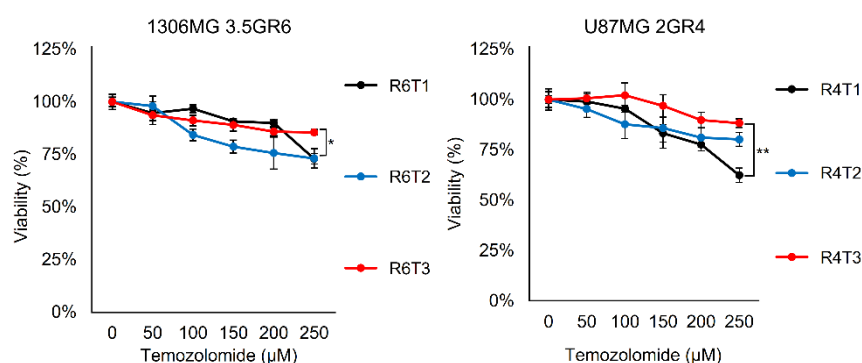

**Figure S1.** Developing a radiation-temozolomide-resistant glioblastoma cell model. A Trypan blue exclusion assay was performed to determine cell viability of consecutive treatment of temozolomide (TMZ). 0.1% DMSO was used as the solvent control (labeled with 0  $\mu$ M). T1, T2, T3 performed as the times of TMZ treatments. The data are represented as mean  $\pm$  SEM; \* refers to a comparison with R6T3 or R4T3; \*,  $p < 0.05$ ; \*\*,  $p < 0.01$ .

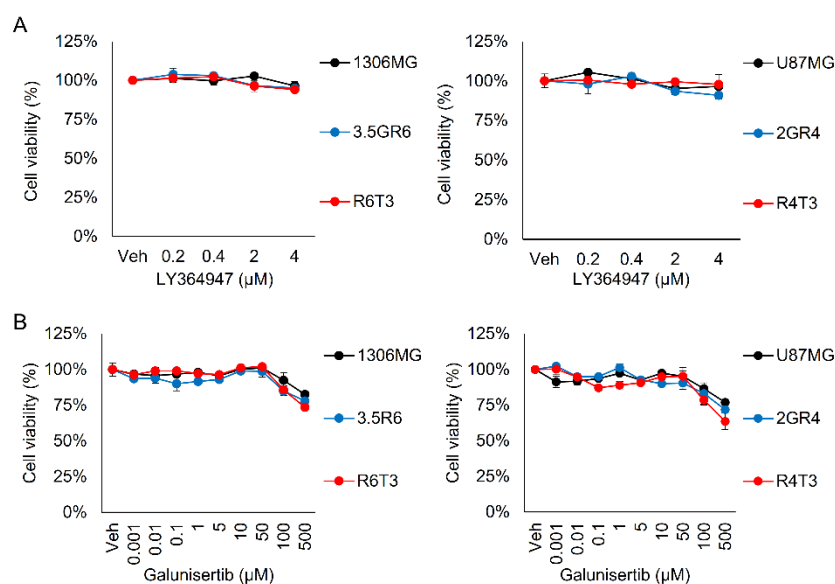

**Figure S2.** The cytotoxicity of LY364947 and Galunisertib. A MTT assay was performed to determine cytotoxicity of LY364947 and Galunisertib. 0.1% DMSO was used as the solvent control (labeled with Veh). (A) The cell viability curve of treating LY364947 for 24 hours; N=3 for each cell lines; (B) The cell viability curve of treating Galunisertib for 24 hours; N=3 for each cell lines; mean  $\pm$  SEM.

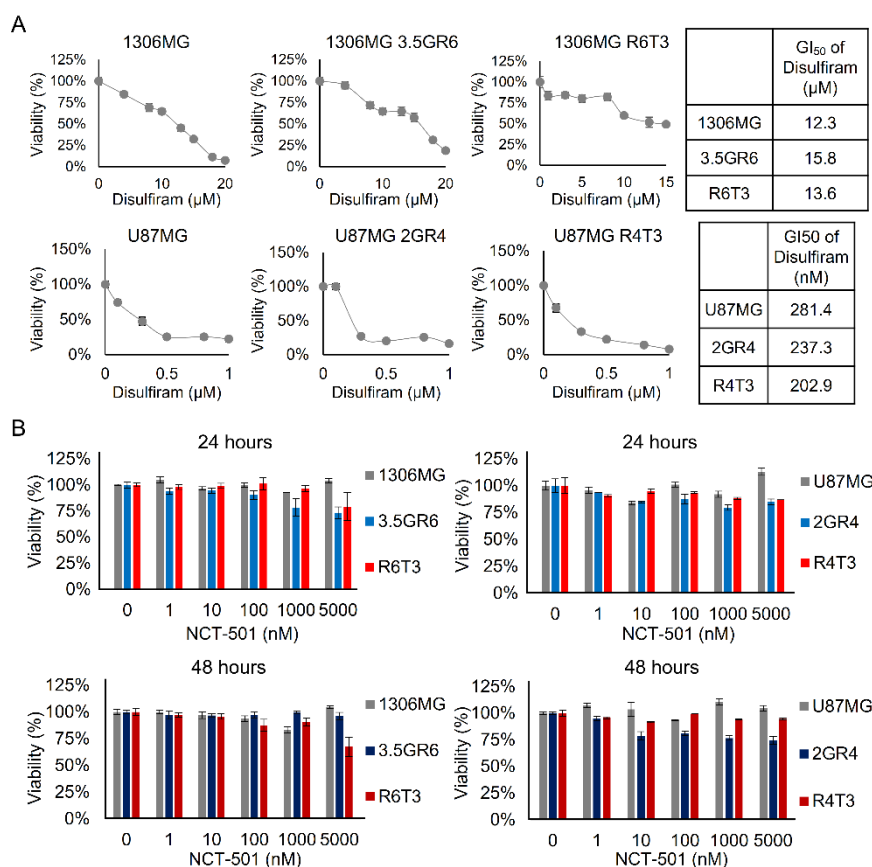

**Figure S3.** Cell response to pan-ALDH and ALDH1A1 inhibition by Disulfiram and NCT-501. A Trypan blue exclusion assay was performed to determine cell viability. 0.1% DMSO was used as solvent control (labelled as 0). (A) Line graphs and tables showing the effect of Disulfiram on cell viability; N=3 for each cell lines; (B) histograms showing the effect of NCT-501 on cell viability; N=4 for each cell lines; mean  $\pm$  SEM.

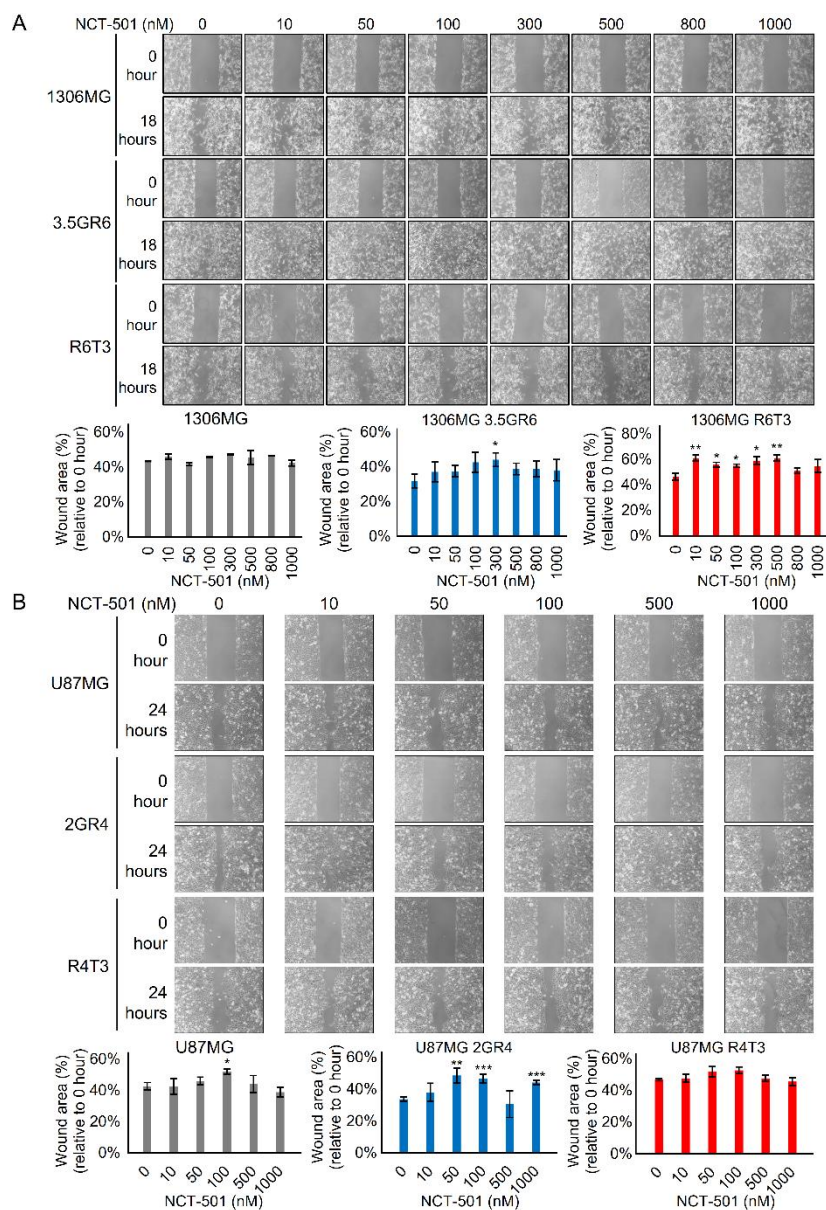

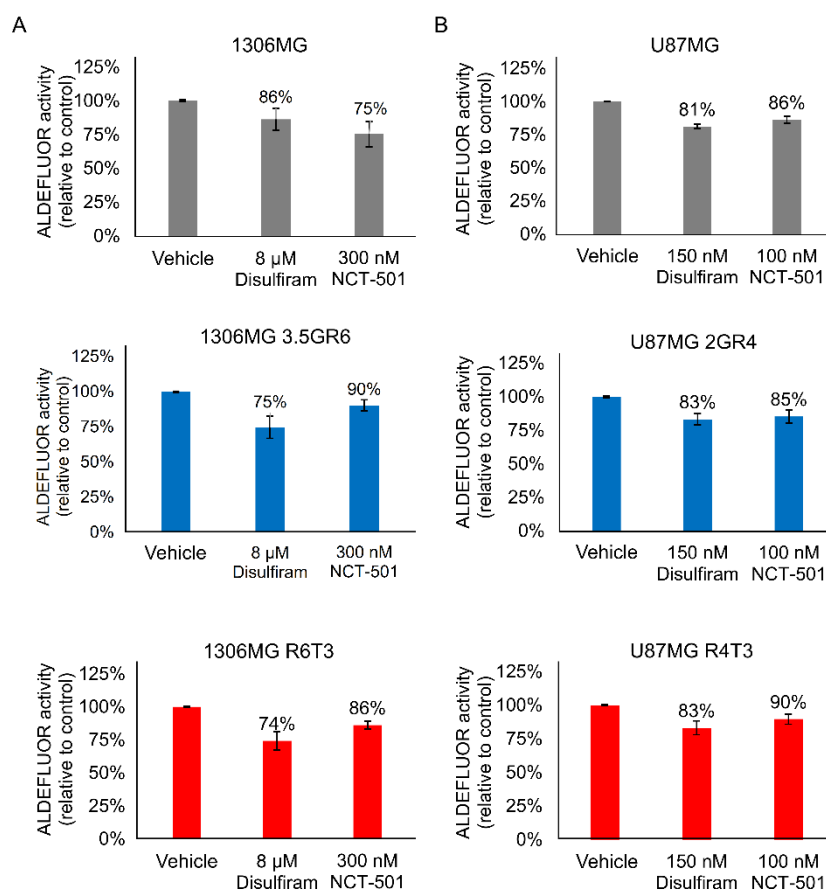

**Figure S5.** The inhibitory efficacy of DSF and NCT-501 on the activity of ALDH. An ALDEFLUOR assay was used to evaluate the inhibitory efficacy of selected doses of DSF and NCT-501. 0.1% DMSO was used as vehicle control. (A) Histogram showing the ALDH activity of parental 1306MG, radiation-resistant 1306MG 3.5GR6, and radiation-TMZ-resistant 1306MG R6T3; N=4; (B) histogram showing the ALDH activity of parental U87MG, radiation-resistant U87MG 2GR4, and radiation-TMZ-resistant U87MG R4T3; N=3 for U87MG; N=4 for 2GR4; N=5 for R4T3; mean  $\pm$  SEM.
